# Supplementary material for: Prevalence, Characteristics, and Determinants of Suboptimal Care in the Initial Management of Community-Onset Severe Bacterial Infections in Children
Source: PubMed Central journal article supplement (PMC9194668; doi:10.1001/jamanetworkopen.2022.16778), 2022-06-13
Supplement: jamanetwopen-e2216778-s001.pdf [file jamanetwopen-e2216778-s001.pdf]

## Supplemental Online Content

Lorton F, Chalumeau M, Martinot A, et al. Prevalence, characteristics, and determinants of suboptimal care in the initial management of community-onset severe bacterial infections in children. *JAMA Netw Open*. 2022;5(6):e2216778. doi:10.1001/jamanetworkopen.2022.16778

**eFigure.** Directed Acyclic Graph Modeling the Relation Between the Quality of Initial Care and the Outcome of Children With a Community-Onset Severe Bacterial Infection

**eAppendix.** Calculation of the Number of Patients to Be Recruited

**eTable 1.** Degree of Agreement Among Experts on the Assessment of the Quality of Care According to the Kappa Coefficient Interpreted by the Landis and Koch Scale

**eTable 2.** Detailed Characteristics of the Quality of Care Before Admission to a Pediatric Intensive Care Unit in Children With a Community-Onset Severe Bacterial Infection

**eTable 3.** Examples of the Different Categories of Quality of Care Evaluated by the Experts for the Eight Major Types of Cares

This supplemental material has been provided by the authors to give readers additional information about their work.

**eFigure:** Directed Acyclic Graph Modeling the Relation Between the Quality of Initial Care and the Outcome of Children With a Community-Onset Severe Bacterial Infection.

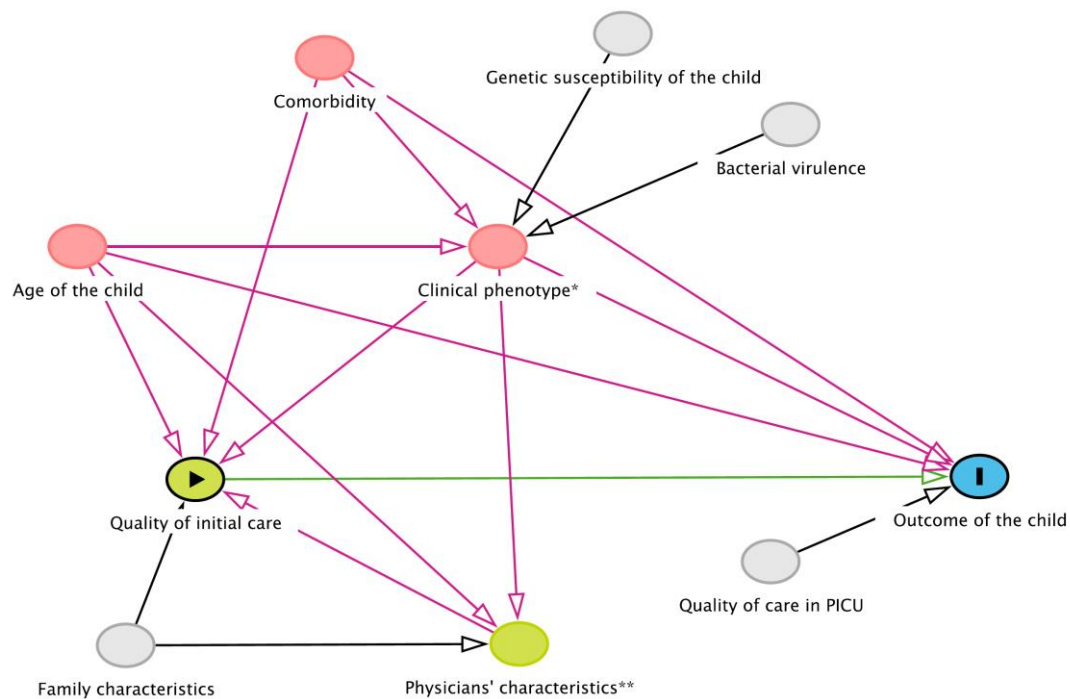

The green circle with a triangle corresponds to the exposure variable (the quality of initial care), the blue circle corresponds to the variable to be explained (the child's outcome: survival without sequelae, survival with severe sequelae at PICU discharge or death), the pink circles are the potential confounding factors (ancestors of the exposure variable and the variable to be explained), the green circle without a triangle is an “ancestor” of the exposure variable, and the grey circles are the variables unobserved.

\*The clinical phenotype corresponds to the discharge diagnosis of the infection and its clinical severity, estimated by the presence of signs of severity at the first medical consultation.

\*\*The characteristics of physicians correspond to the type of medical service consulted and the density of medical doctors in the home department.

**eAppendix:** Calculation of the Number of Patients to Be Recruited.

The number of patients required based on the measure of the association between suboptimal management and occurrence of death in children with community-onset severe bacterial infection. Considering an expected percentage of suboptimal management of approximately 30% in surviving patients, with a risk  $\alpha$  of 5% for a power of 80%, we needed to include at least 26 deceased patients and 153 surviving patients to be able to demonstrate an odds ratio  $\geq 3$ .

**eTable 1:** Degree of Agreement Among Experts on the Assessment of the Quality of Care According to the Kappa Coefficient Interpreted by the Landis and Koch Scale.<sup>a</sup>

|                                           | <b>Kappa value<br/>+/- SD</b> | <b>Degree of agreement</b> |
|-------------------------------------------|-------------------------------|----------------------------|
| <b>Global management</b>                  | 0.67 ± 0.05                   | Substantial                |
| <b>Time in seeking care by the family</b> | 0.22 ± 0.04                   | Fair                       |
| <b>Medical evaluation of severity</b>     | 0.31 ± 0.05                   | Fair                       |
| <b>Patient referral</b>                   | 0.40 ± 0.05                   | Fair                       |
| <b>Antibiotic therapy timing</b>          | 0.58 ± 0.12                   | Moderate                   |
| <b>Antibiotic therapy dosage</b>          | 0.26 ± 0.08                   | Fair                       |
| <b>Fluid bolus timing</b>                 | 0.34 ± 0.15                   | Fair                       |
| <b>Fluid bolus volume</b>                 | 0.41 ± 0.16                   | Moderate                   |
| <b>Assessment after fluid bolus</b>       | 0.36 ± 0.29                   | Fair                       |

SD, standard deviation

<sup>a</sup>Landis JR, Koch GG. The measurement of observer agreement for categorical data. *Biometrics*.1977;33(1):159-174. Medline:843571 doi:10.2307/2529310

**eTable 2:** Detailed Characteristics of the Quality of Care Before Admission to a Pediatric Intensive Care Unit in Children With a Community-Onset Severe Bacterial Infection

|                                        | Total      | Outcome of children, No. (%) |           |                         |
|----------------------------------------|------------|------------------------------|-----------|-------------------------|
|                                        |            | Surviving without sequelae   | Died      | Surviving with sequelae |
|                                        | N=259      | N=207                        | N=27      | N=25                    |
| <b>Global management, n§</b>           | 259        | 207                          | 27        | 25                      |
| Certainly suboptimal                   | 89 (34.4)  | 71 (34.3)                    | 3 (11.1)  | 15 (60.0)               |
| Possibly suboptimal                    | 100 (38.6) | 80 (38.6)                    | 12 (44.4) | 8 (32.0)                |
| Optimal                                | 70 (27.0)  | 56 (27.1)                    | 12 (44.4) | 2 (8.0)                 |
| Cannot judge                           | 0 (0.0)    | 0 (0.0)                      | 0 (0.0)   | 0 (0.0)                 |
| Not concerned                          | 0          | 0                            | 0         | 0                       |
| <b>Time in seeking care, n</b>         | 259        | 207                          | 27        | 25                      |
| Certainly suboptimal                   | 63 (24.3)  | 51 (24.6)                    | 6 (22.2)  | 6 (24.0)                |
| Possibly suboptimal                    | 5 (1.9)    | 5 (2.4)                      | 0 (0.0)   | 0 (0.0)                 |
| Optimal                                | 184 (71.0) | 144 (69.6)                   | 21(77.8)  | 19 (76.0)               |
| Cannot judge                           | 7 (2.7)    | 7 (3.4)                      | 0 (0.0)   | 0 (0.0)                 |
| Not concerned                          | 0          | 0                            | 0         | 0                       |
| <b>Evaluation of severity, n</b>       | 259        | 207                          | 27        | 25                      |
| Certainly suboptimal                   | 49 (18.9)  | 40 (19.3)                    | 3 (11.1)  | 6 (24.0)                |
| Possibly suboptimal                    | 18 (6.9)   | 14 (6.8)                     | 2 (7.4)   | 2 (8.0)                 |
| Optimal                                | 186 (71.8) | 149 (72.0)                   | 20 (74.1) | 17 (68.0)               |
| Cannot judge                           | 6 (2.3)    | 4 (1.9)                      | 2 (7.4)   | 0                       |
| Not concerned                          | 0          | 0                            | 0         | 0                       |
| <b>Patient referral, n</b>             | 259        | 207                          | 27        | 25                      |
| Certainly suboptimal                   | 48 (18.5)  | 39 (18.8)                    | 2 (7.4)   | 7 (28.0)                |
| Possibly suboptimal                    | 17 (6.6)   | 13 (6.3)                     | 2 (7.4)   | 2 (8.0)                 |
| Optimal                                | 183 (70.7) | 147 (71.0)                   | 21 (77.8) | 15 (60.0)               |
| Cannot judge                           | 11 (4.2)   | 8 (3.9)                      | 2 (7.4)   | 1 (4.0)                 |
| Not concerned                          | 0          | 0                            | 0         | 0                       |
| <b>Antibiotic therapy timing, n</b>    | 258        | 207                          | 26        | 25                      |
| Certainly suboptimal                   | 133 (51.6) | 110 (53.1)                   | 7 (26.9)  | 16 (64.0)               |
| Possibly suboptimal                    | 4 (1.6)    | 4 (1.9)                      | 0 (0.0)   | 0 (0.0)                 |
| Optimal                                | 120 (46.5) | 93 (44.9)                    | 18 (69.2) | 9 (36.0)                |
| Cannot judge                           | 1 (0.4)    | 0 (0.0)                      | 1 (3.8)   | 0 (0.0)                 |
| Not concerned                          | 1          | 0                            | 1         | 0                       |
| <b>Antibiotic therapy dosage, n</b>    | 233        | 190                          | 22        | 21                      |
| Certainly suboptimal                   | 25 (10.7)  | 22 (11.6)                    | 1 (4.5)   | 2 (9.5)                 |
| Possibly suboptimal                    | 1 (0.4)    | 1 (0.5)                      | 0 (0.0)   | 0 (0.0)                 |
| Optimal                                | 189 (81.1) | 153 (80.5)                   | 20 (90.9) | 16 (76.2)               |
| Cannot judge                           | 18 (7.7)   | 14 (7.4)                     | 1 (4.5)   | 3 (14.3)                |
| Not concerned                          | 26         | 17                           | 5         | 4                       |
| <b>Fluid bolus timing, n</b>           | 230        | 187                          | 22        | 21                      |
| Certainly suboptimal                   | 128 (55.7) | 110 (58.8)                   | 6 (27.3)  | 12 (57.1)               |
| Possibly suboptimal                    | 5 (2.2)    | 5 (2.7)                      | 0 (0.0)   | 0 (0.0)                 |
| Optimal                                | 97 (42.2)  | 72 (38.5)                    | 16 (72.7) | 9 (42.9)                |
| Cannot judge                           | 0 (0.0)    | 0 (0.0)                      | 0 (0.0)   | 0 (0.0)                 |
| Not concerned                          | 29         | 20                           | 5         | 4                       |
| <b>Fluid bolus volume, n</b>           | 169        | 131                          | 22        | 16                      |
| Certainly suboptimal                   | 56 (33.1)  | 49 (37.4)                    | 3 (13.6)  | 4 (25.0)                |
| Possibly suboptimal                    | 3 (1.8)    | 3 (2.3)                      | 0 (0.0)   | 0 (0.0)                 |
| Optimal                                | 97(57.4)   | 68 (51.9)                    | 18 (81.8) | 11 (68.8)               |
| Cannot judge                           | 13 (7.7)   | 11 (8.4)                     | 1 (4.5)   | 1 (6.2)                 |
| Not concerned                          | 90         | 76                           | 5         | 9                       |
| <b>Assessment after fluid bolus, n</b> | 169        | 131                          | 22        | 16                      |
| Certainly suboptimal                   | 29 (17.2)  | 23 (17.6)                    | 2 (9.1)   | 4 (25.0)                |
| Possibly suboptimal                    | 2 (1.2)    | 2 (1.5)                      | 0 (0.0)   | 0 (0.0)                 |

|               |            |           |           |          |
|---------------|------------|-----------|-----------|----------|
| Optimal       | 123 (72.8) | 97 (74.0) | 17 (77.3) | 9 (56.3) |
| Cannot judge  | 15 (8.9)   | 9 (6.9)   | 3 (13.6)  | 3 (18.8) |
| Not concerned | 90         | 76        | 5         | 9        |

N=number of children with community-onset severe bacterial infection.

§ The number “n” refers to children concerned by the care assessed.

**eTable 3:** Examples of the Different Categories of Quality of Care Evaluated by the Experts for the Eight Major Types of Cares.

|                                           | Quality of care (as evaluated by the experts)                                                                                        |                                                                                                                                                                        |                                                                                                                                                  |
|-------------------------------------------|--------------------------------------------------------------------------------------------------------------------------------------|------------------------------------------------------------------------------------------------------------------------------------------------------------------------|--------------------------------------------------------------------------------------------------------------------------------------------------|
|                                           | Optimal                                                                                                                              | Certainly suboptimal                                                                                                                                                   | Possibly suboptimal*                                                                                                                             |
| <b>Time in seeking care by the family</b> | GP consultation at 2 hr of the onset of symptoms (fever, chills, pale skin, vomiting) in a 3-year-old child with no previous history | Medical consultation by telephone at 3 hr of the onset of a febrile purpuric rash with behavioral changes in a 22-month-old child                                      | GP consultation at 12 hr of the onset of symptoms (fever, vomiting, headache, phono-photophobia) in a 15-year-old child with no previous history |
| <b>Physician's evaluation of severity</b> | GP's recognition of signs of sepsis in a 9-month-old child with fever, hypotonia, and tachycardia                                    | Diagnosis of a viral infection and return home in a 14-year-old child with fever (temperature 41.3°C), vomiting, and headache. Vital signs not measured by the GP      | Diagnosis of infant colic and return home in a 2-month-old infant with vomiting and grunting without fever                                       |
| <b>Patient referral</b>                   | GP's referral to ED (transport <15 min) for suspected meningitis in a 5-year-old child                                               | Discharge home with a diagnosis of otitis after ED consultation for fever, vomiting, and grunting with signs of sepsis at clinical examination in a 13-month-old child | Hospitalization of a 1-month-old infant with bacterial meningitis in a general pediatric ward                                                    |
| <b>Antibiotic therapy timing</b>          | Antibiotic administration 30 min after the recognition of signs of sepsis                                                            | Antibiotic administration 5 hr after medical examination with signs of sepsis and suspicion of meningitis                                                              | Antibiotic administration 2 hr after medical examination with signs of sepsis in a context of toxic skin eruption                                |
| <b>Antibiotic therapy dosage</b>          | Ceftriaxone at 50 mg/kg/day in a context of sepsis with no source                                                                    | Cefotaxime at 100 mg/kg/day in a context of bacterial meningitis                                                                                                       | Amoxicillin/clavulanate at 80 mg/kg/day in a context of varicella with cellulitis <sup>§</sup>                                                   |
| <b>Fluid bolus timing</b>                 | 20 min after the diagnosis of purpura fulminans                                                                                      | 1 hr after the diagnosis of severe sepsis                                                                                                                              | 40 min after the diagnosis of severe sepsis in a context of peritonitis                                                                          |
| <b>Fluid bolus volume</b>                 | Volume at 20 ml/kg over 15 min in a context of purpura fulminans                                                                     | Volume at 20 ml/kg over 1 hr in a context of purpura fulminans                                                                                                         | Volume at 40 ml/kg over 1 hr for sepsis in a context of pneumonia with effusion                                                                  |
| <b>Assessment after fluid bolus</b>       | Clinical reassessment 10 min after the fluid bolus administration                                                                    | No clinical reassessment after the fluid bolus administration                                                                                                          | Clinical reassessment 1 hr after the fluid bolus administration                                                                                  |

ED, emergency department; GP, general practitioner

\* Children whose care was judged as "possibly suboptimal" were not included in the analyses of the association involving the quality of care.

§ According to the French Pediatric Infectious Pathology Group, the recommended dosage of amoxicillin was 100 mg/kg/day at the time of the study (Moulin F, Quinet B, Raymond J, Gillet Y, Cohen R. Managing children skin and soft tissue infections [in French]. *Arch Pediatr*. 2008;15(suppl 2):S62-S67. Medline:19000857 doi:10.1016/S0929-693X(08)74218-0
